# Supplementary material for: Redox-Mediated Gold Nanoparticles with Glucose Oxidase and Egg White Proteins for Printed Biosensors and Biofuel Cells
Source: MDPI journal article supplement (doi:10.3390/ijms24054657), 2023-02-28
Supplement: s1 [file s1]

# Redox Mediated Gold Nanoparticles with Glucose Oxidase and Egg White Proteins for Printed Biosensors and Biofuel Cells

Natcha Rasitanon<sup>1,2</sup>, Kornautchaya Veenuttranon<sup>1</sup>, Hnin Thandar Lwin<sup>3</sup>, Kanyawee Kaewpradub<sup>1,2</sup>, Tonghathai Phairatana<sup>3,4</sup> and Itthipon Jeerapan<sup>1,2,5,\*</sup>

- 1 Center of Excellence for Trace Analysis and Biosensor, Prince of Songkla University, Hat Yai, Songkhla 90110, Thailand
- 2 Division of Physical Science, Faculty of Science, Prince of Songkla University, Hat Yai, Songkhla 90110, Thailand
- 3 Department of Biomedical Sciences and Biomedical Engineering, Faculty of Medicine, Prince of Songkla University, Hat Yai, Songkhla, 90110, Thailand
- 4 Institute of Biomedical Engineering, Faculty of Medicine, Prince of Songkla University, Hat Yai, Songkhla, 90110, Thailand
- 5 Center of Excellence for Innovation in Chemistry, Faculty of Science, Prince of Songkla University, Hat Yai, Songkhla 90110, Thailand

\* Correspondence: itthipon.j@psu.ac.th  
ORCID: <https://orcid.org/0000-0001-8016-6411>

## Supporting Equations

Additional equations used for  $K_m$  and  $I_{max}$  calculation:

The Lineweaver-Burk equation:

$$\frac{1}{I} = \frac{K_m}{I_{max}} \frac{1}{[C]} + \frac{1}{I_{max}} \quad (\text{Equation S1})$$

The Hanes-Woolf equation:

$$\frac{[C]}{I} = \frac{1}{I_{max}} [C] + \frac{K_m}{I_{max}} \quad (\text{Equation S2})$$

The Eadie-Hofstee equation:

$$I = -K_m \frac{I}{[C]} + I_{max} \quad (\text{Equation S3})$$

Where  $I$  is the steady-state current after the addition of glucose,  $I_{max}$  is the maximum current obtained from saturated glucose concentrations,  $C$  is the glucose concentration, and  $K_m$  is the Michaelis-Menten constant.

---

## Supporting Figures

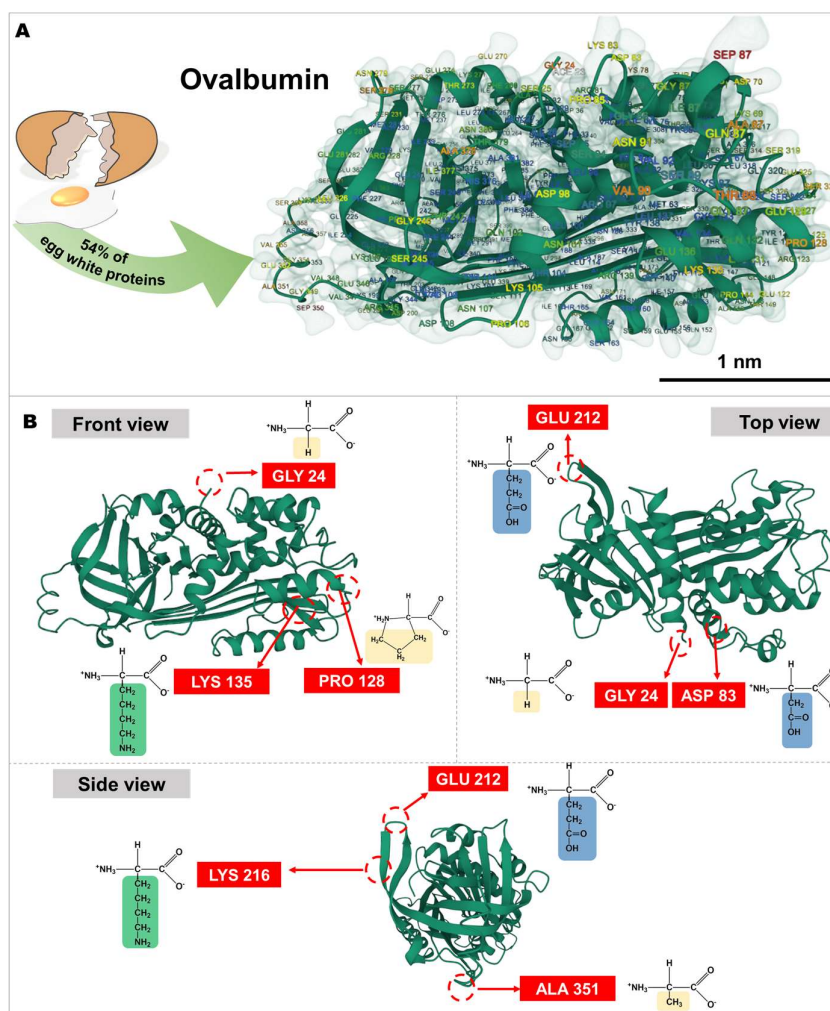

**Figure S1.** Structure of ovalbumin (PDB: 1OVA). (A) Overview of the ovalbumin structure and amino acids. Ovalbumin is a main component in egg white proteins [1]. (B) Location of some important amino acids, along with molecular structures, in the ovalbumin structure.

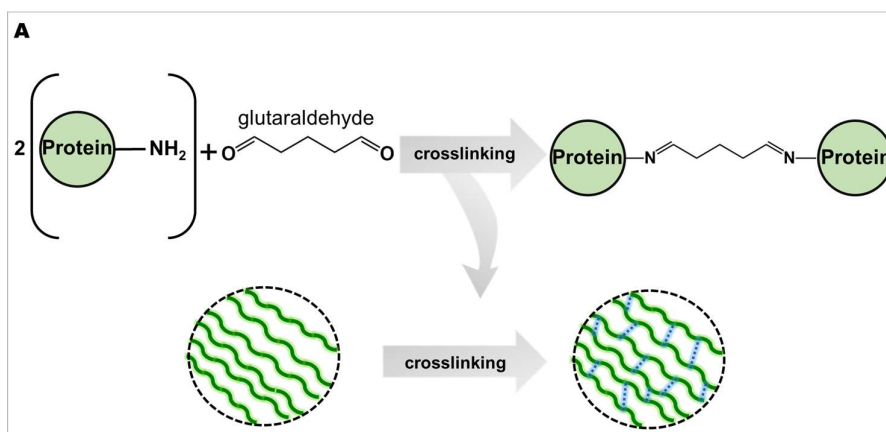

**Figure S2.** Cross-link reaction between proteins, such as proteins from GOx and egg white proteins (including ovalbumin), and glutaraldehyde.

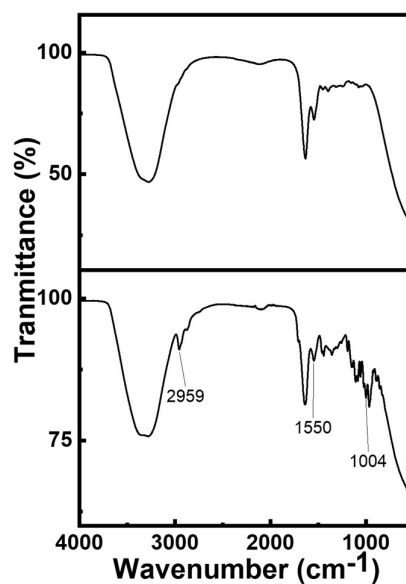

**Figure S3.** FTIR spectra of egg white proteins (a) before and (b) after crosslinking with glutaraldehyde.

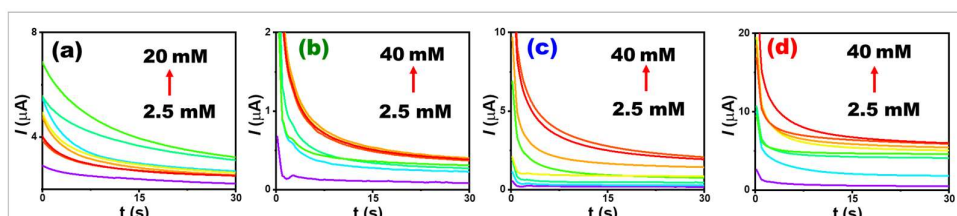

**Figure S4.** Amperograms of screen-printed bioelectrodes using different numbers of AuNPs with an applied potential of 0.40 V vs. Ag/AgCl upon increasing the glucose concentrations. These electrodes (a–d) refer to Figure 2A. These screen-printed bioelectrodes (a–d) use 0, 27, 137, and 274 G-units of AuNPs with 750 nmol NQ.

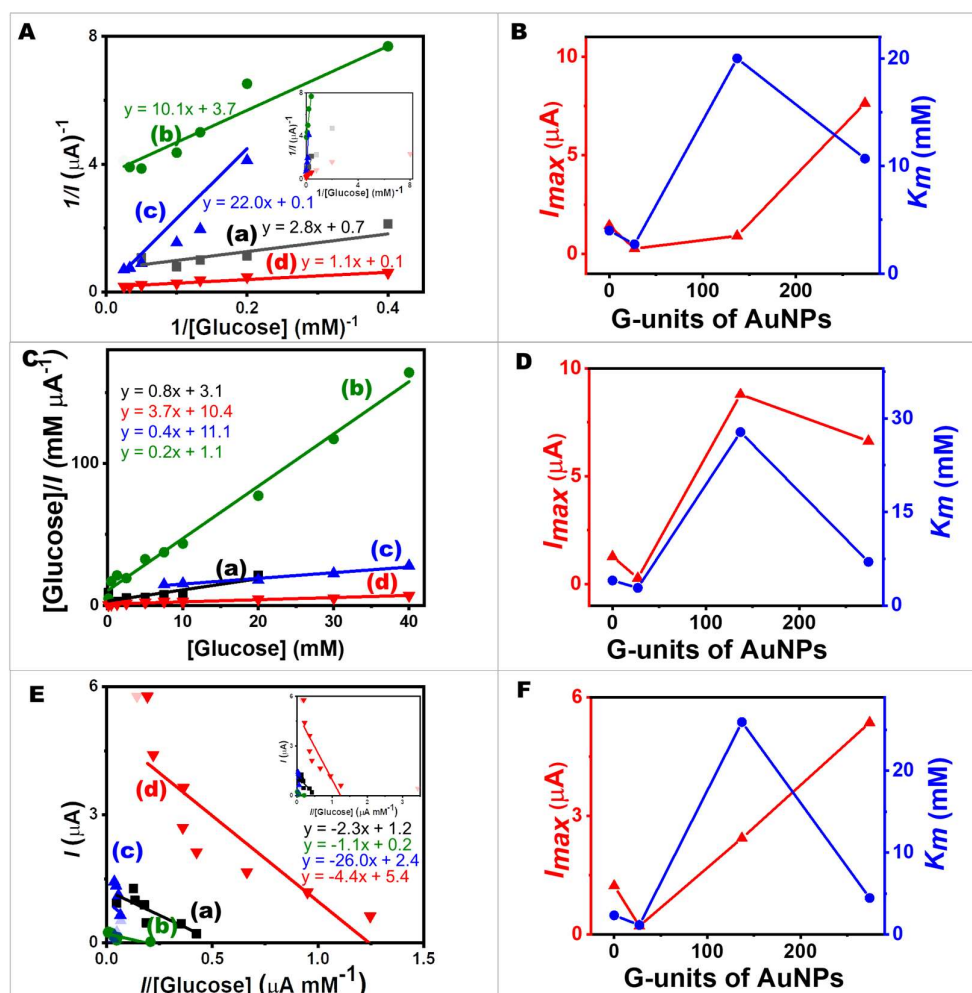

**Figure S5.** The plots used for estimating  $K_m$  and  $I_{max}$  referring to Figure S4. These screen-printed bioelectrodes (a-d) use 0, 27, 137, and 274 G-units of AuNPs with 750 nmol NQ. (A) The Lineweaver-Burk plot. (B)  $I_{max}$ , and  $K_m$  values estimated from the Lineweaver-Burk plot. (C) The Hanes-Woolf plot. (D)  $I_{max}$ , and  $K_m$  values estimated from the Hanes-Woolf plot. (E) The Eadie-Hofstee plot. (F)  $I_{max}$ , and  $K_m$  values estimated from the Eadie-Hofstee plot. Data points in light colors are excluded during fitting.

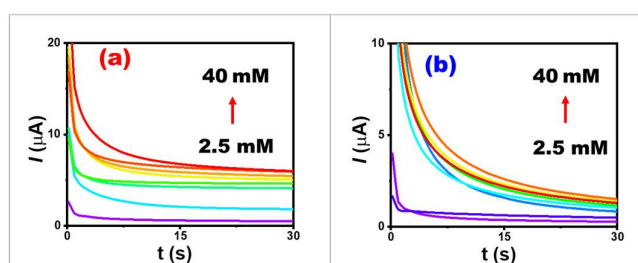

**Figure S6.** Amperogram responses of screen-printed bioelectrodes of different layer arrangements with an applied potential of 0.4 V vs. Ag/AgCl upon increasing the glucose concentrations. These electrodes (a-b) refer to Figure 3A. These screen-printed bioelectrodes (a-b) two different layout arrangement with the same total volume of 10  $\mu L$  of 10%v/v egg white proteins, 10  $\mu L$  of 10 mg mL<sup>-1</sup> GOx (in 10%v/v egg white proteins), and 274 G-units of AuNPs with 750 nmol NQ.

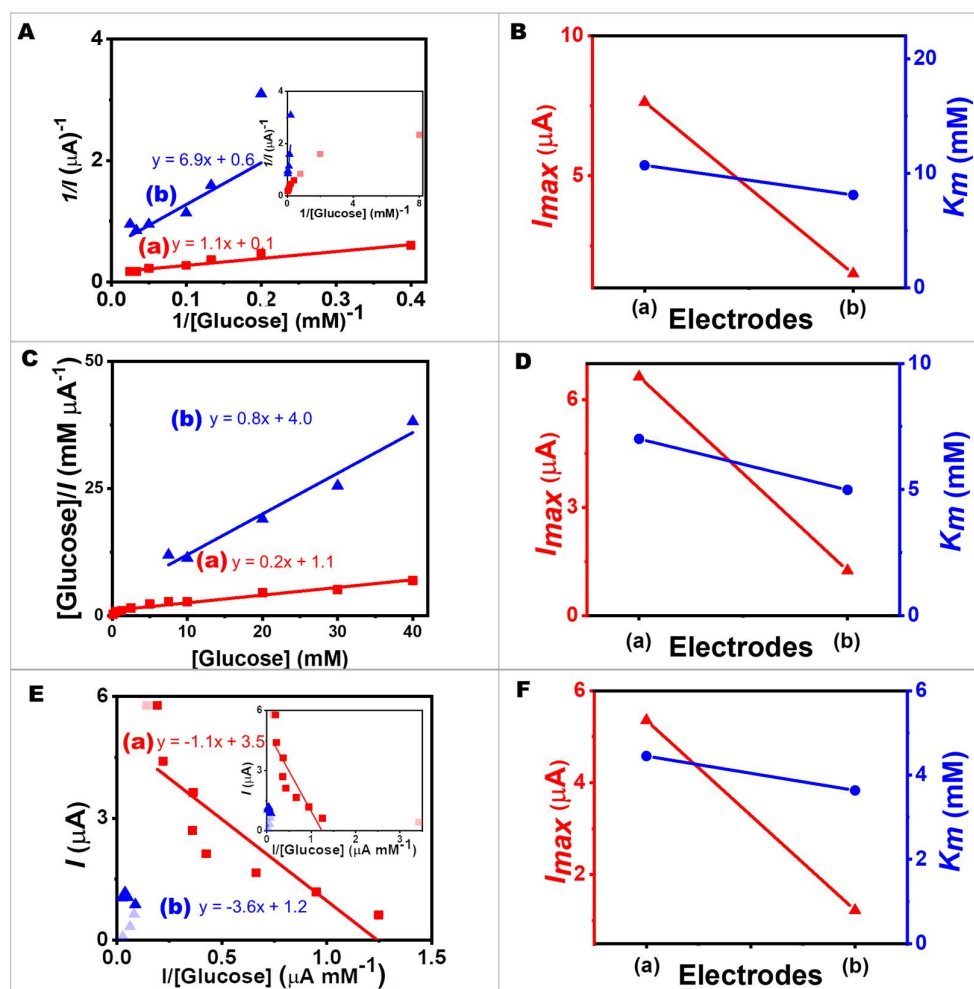

**Figure S7.** The plots used for estimating  $K_m$  and  $I_{max}$  referring to Figure S6. These screen-printed bioelectrodes (a–b) two different layout arrangement with the same total volume of 10  $\mu L$  of 10%v/v egg white proteins, 10  $\mu L$  of 10 mg  $mL^{-1}$  GOx (in 10%v/v egg white proteins), and 274 G-units of AuNPs with 750 nmol NQ. (A) The Lineweaver–Burk plot. (B)  $I_{max}$ , and  $K_m$  values estimated from the Lineweaver–Burk plot. (C) The Hanes–Woolf plot. (D)  $I_{max}$ , and  $K_m$  values estimated from the Hanes–Woolf plot. (E) The Eadie–Hofstee plot. (F)  $I_{max}$ , and  $K_m$  values estimated from the Eadie–Hofstee plot. Data points in light colors are excluded during fitting.

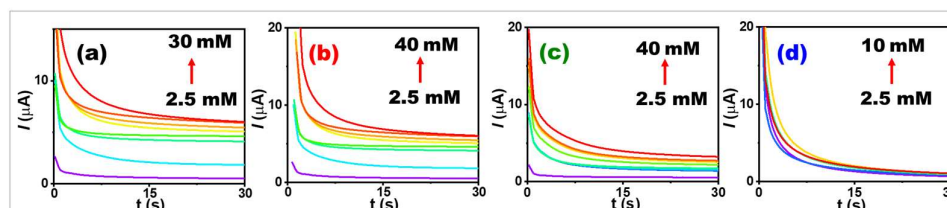

**Figure S8.** Amperograms of screen-printed bioelectrodes using different number of egg white proteins with an applied potential of 0.40 V vs. Ag/AgCl upon increasing the glucose concentrations. These electrodes (a–d) refer to Figure 4A. These screen-printed bioelectrodes with (a–d) 0, 10, 20, and 40  $\mu L$  of 10%v/v egg white solution.

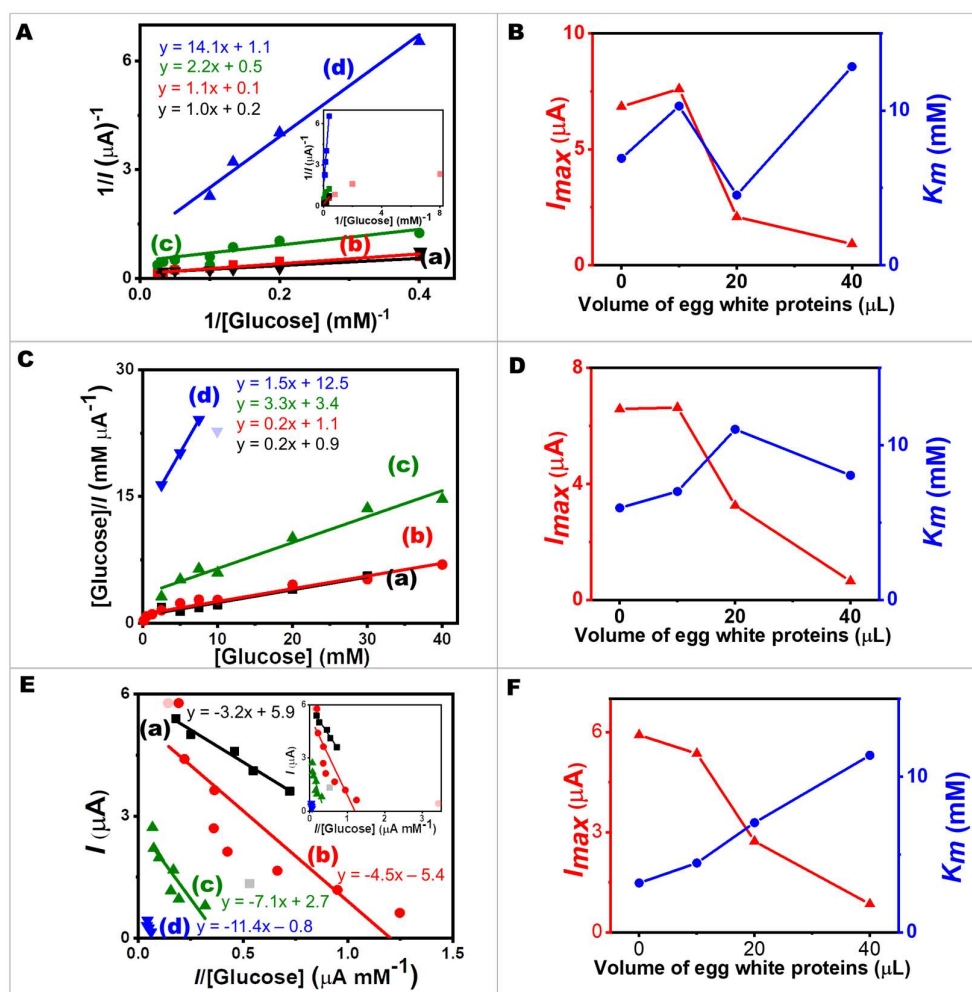

**Figure S9.** The plots used for estimating  $K_m$  and  $I_{max}$  referring to Figure S8. These screen-printed bioelectrodes with (a-d) 0, 10, 20, and 40  $\mu\text{L}$  of 10%v/v egg white solution. (A) The Lineweaver-Burk plot. (B)  $I_{max}$ , and  $K_m$  values estimated from the Lineweaver-Burk plot. (C) The Hanes-Woolf plot. (D)  $I_{max}$ , and  $K_m$  values estimated from the Hanes-Woolf plot. (E) The Eadie-Hofstee plot. (F)  $I_{max}$ , and  $K_m$  values estimated from the Eadie-Hofstee plot. Data points in light colors are excluded during fitting.

## Reference

1. Abeyrathne, E.D.N.S.; Lee, H.Y.; Ahn, D.U. Egg white proteins and their potential use in food processing or as nutraceutical and pharmaceutical agents—A review. *Poultry Science* **2013**, *92*, 3292-3299, doi:<https://doi.org/10.3382/ps.2013-03391>.
